# Supplementary material
Source: MDPI journal article supplement (https://www.mdpi.com/2071-1050/13/4/2372)
Supplement: s1 [file s1]

Archive with 3 entries (3 files):
- Supplementary file-1_Questionnaire Fish Processing Industry.pdf
- Supplementary file-2_Questionnaire Feed Mills.pdf
- Supplementary-file-3.pdf
