# Supplementary material
Source: MDPI journal article supplement (https://www.mdpi.com/2071-1050/13/4/2372)
Supplement: s1 [file s1 › Supplementary file-1_Questionnaire Fish Processing Industry.pdf]

### Survey Form of Seafood Processing Industry

**Investigator:** Md Jakiul Islam, Assistant Professor, Faculty of Fisheries, Sylhet Agricultural University (SAU), Sylhet-3100.

**You are cordially requested to assist our research. For any query(ies) please contact: +8801717337521,**

**Email: [jakiulmi@sau.ac.bd](mailto:jakiulmi@sau.ac.bd)**

---

1. Name of the processing industry: .....
2. Company address: .....
3. Annual production capacity:
4. What types of fish and shrimp are processed here?
5. Types of products exported: .....  
.....
6. Quantity of the products exported every year:
7. How much (%) waste is produced from a fish?
8. How much (%) waste is produced from a shrimp/prawn?
9. Amount of wastage produced:                      kg/day,                      kg/month,                      kg/year:
10. How does your industry manage the seafood waste?
11. Do your industry utilize the fish by-products:                      Yes                      No
12. If YES, then which types of products your industry commonly prepare from fish wastage?
13. What type of technology is used for the processing and utilization of wastage?
14. If the answer of the question number 11 is NO, then what do you do of the wastage:  
    Throw outside                      Recycling                      Sell to others                      Other

15. What are the impacts of the technology you are using in fish waste management?

Socially Accepted

Not accepted

Others

Economical

Non-Economical

Others

Environmentally friendly

Unfriendly

Others

16. Are you satisfied with that technology used in waste management?

Yes

No

17. If the answer is NO, then could you explain why are you not satisfied with the technology:

18. Do you have idea about fish silage?

Yes

No

19. If yes, could you explain a little bit more?

20. Impact of existing fish waste utilization on:

Social

.....

Economical

.....

Environmental

.....

21. Could you please express your views on the potential of the utilization the fish wastage?

Date.....

Signature of Surveyor.....

Thank you so much for your support
