# Supplementary material
Source: MDPI journal article supplement (https://www.mdpi.com/2071-1050/13/4/2372)
Supplement: s1 [file s1 › Supplementary file-2_Questionnaire Feed Mills.pdf]

## Survey Form of Feed Mills

**Investigator:** Md Jakiul Islam, Assistant Professor, Faculty of Fisheries, Sylhet Agricultural University (SAU), Sylhet-3100.

**You are cordially requested to assist our research. For any query(ies) please contact: +8801717337521,**

**Email:** [jakiulmi@sau.ac.bd](mailto:jakiulmi@sau.ac.bd)

---

1. Name of the industry: ACI-Godrej Agrovat Privet Limited
2. Company address: Kaderia Tower, (9th Floor) Ja-28/8/B Mohakhali,C/A,Dhaka-1212
3. Annual production capacity: Fish Feeds-100000mt
4. What types of feeds are produced here? Floating Fish feeds & Sinking fish feeds
5. Types of feed ingredients imported: Soyabin, Fish protein, Fish oil, Rap seeds, Meat & bone mill, wheat, Essential amino acid, vitamins & minerals etc.
6. Quantity and cost of the fish mealimported every year by your industry: Not specific
7. How does your industry manage the scarcity of most expensive fish meal? Not mention
8. Does your industry utilize the fish by-products? No
9. If YES, then which types of products do your industry commonly used as replacement of fish meal?
10. Do you have idea on fish silage? Yes
11. If yes, could you explain a little bit more about fish silage?

Fish silage as described here is defined as a liquid product made from whole fish or parts of fish that are liquefied by the action of enzymes in the fish in the presence of an added acid. The enzymes break down fish proteins into smaller soluble units, and the acid helps to speed up their activity while preventing bacterial spoilage. Silage made from white fish offal does not contain much oil, but when it is made from fatty fish like herring it may be necessary to

remove the oil at some stage. There are other methods of making liquid fish protein, for example by adding enzymes or bacteria, but these are not described here.

12. If your industry is provided ample and secured supply of fish silage (cheaper than fish meal) as replacement of fish meal, do you prefer to use it? Thinking but not sure.

13. Could you please express your views on the potential of the utilization the fish silage as a replacement of fish meal?

14. Do you have idea on fish waste from fish processing industries? No

15. If yes, could you explain a little bit more about fish waste?

Date.....20.12.2017.....

Signature of Surveyor.....Arif hasan.....

Thank you so much for your support
