# Supplementary material
Source: MDPI journal article supplement (https://www.mdpi.com/2071-1050/13/4/2372)
Supplement: s1 [file s1 › Supplementary-file-3.pdf]

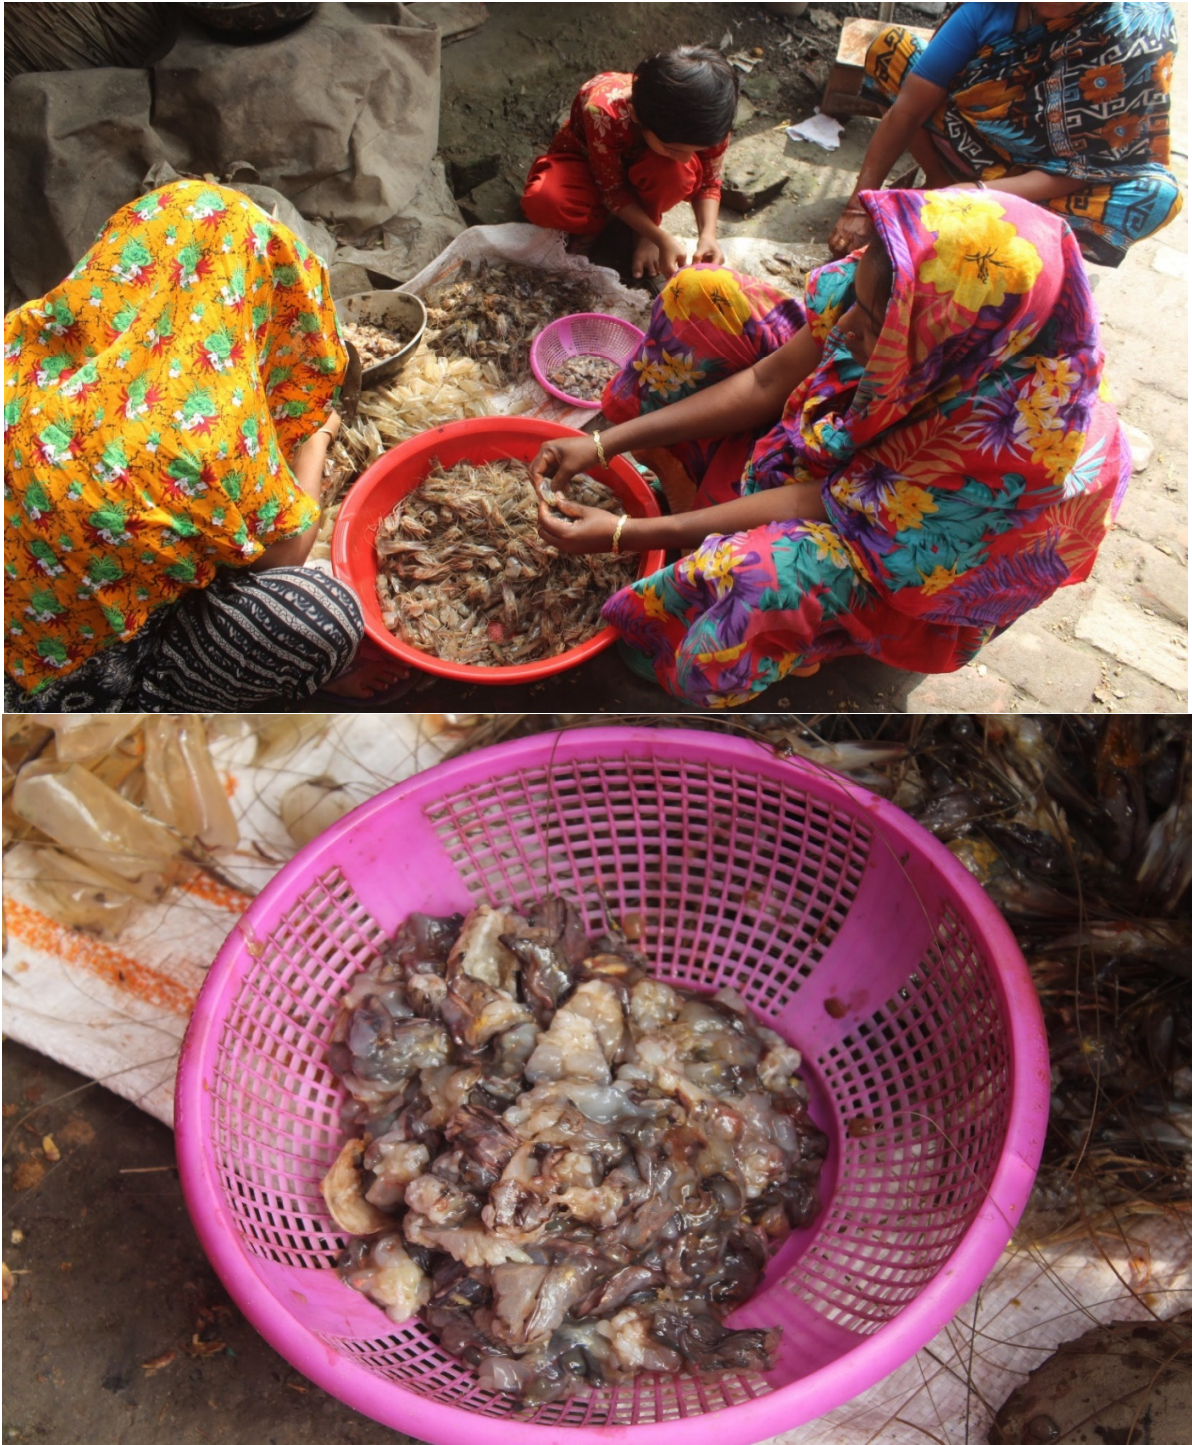

Figure 1. Women are processing shrimp head meat for household consumption.

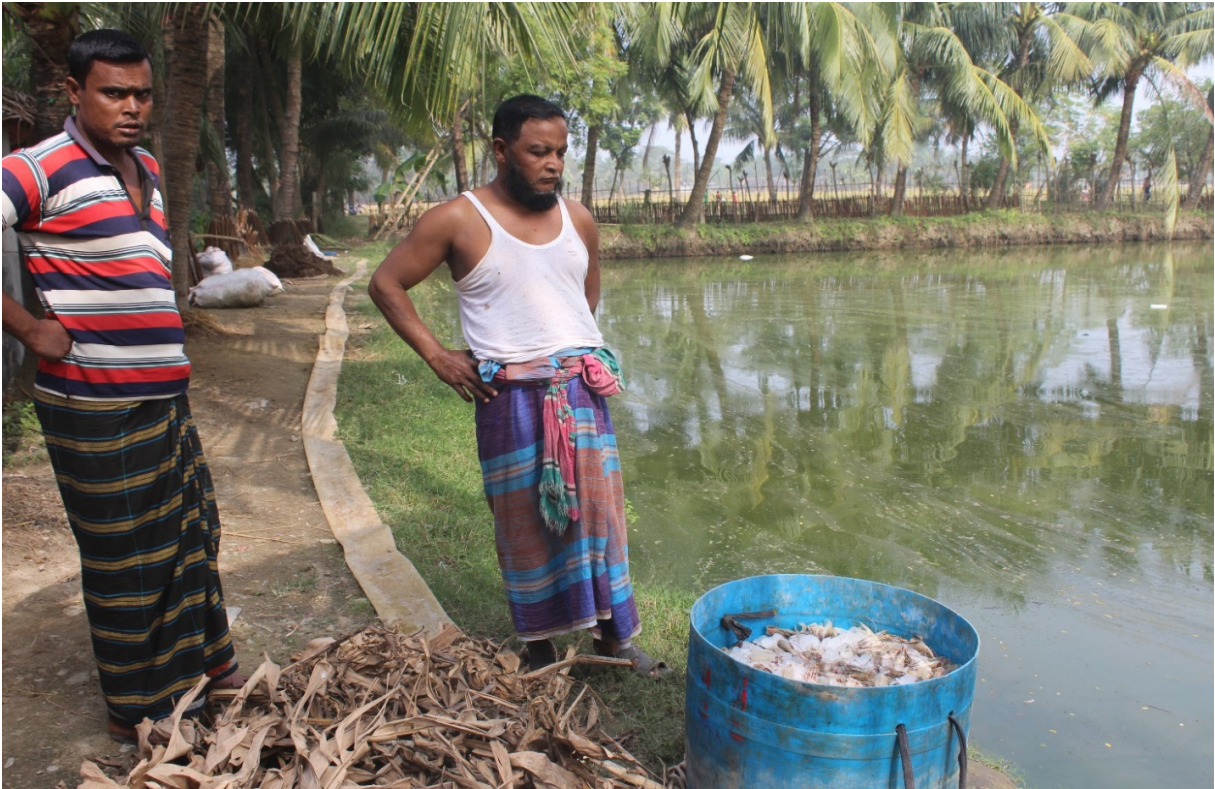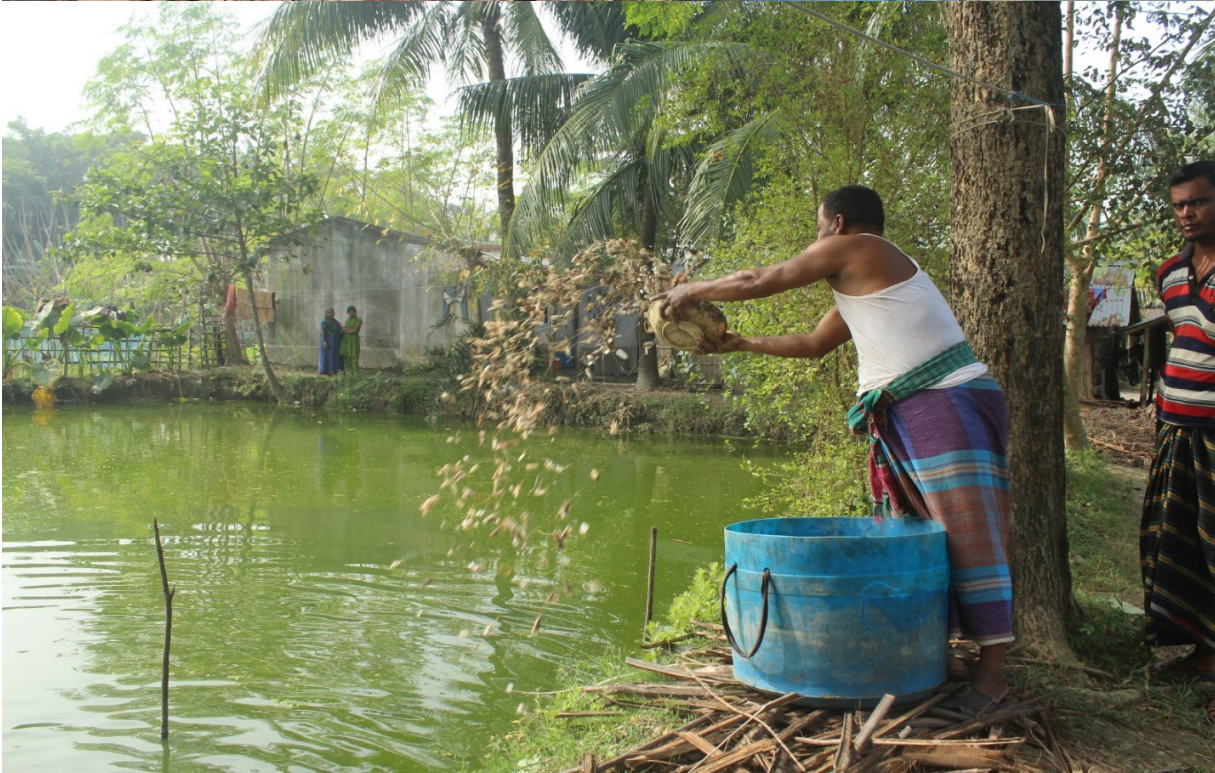

*Figure 2. Fish and shrimp wastes are used to feed the farmed fish*

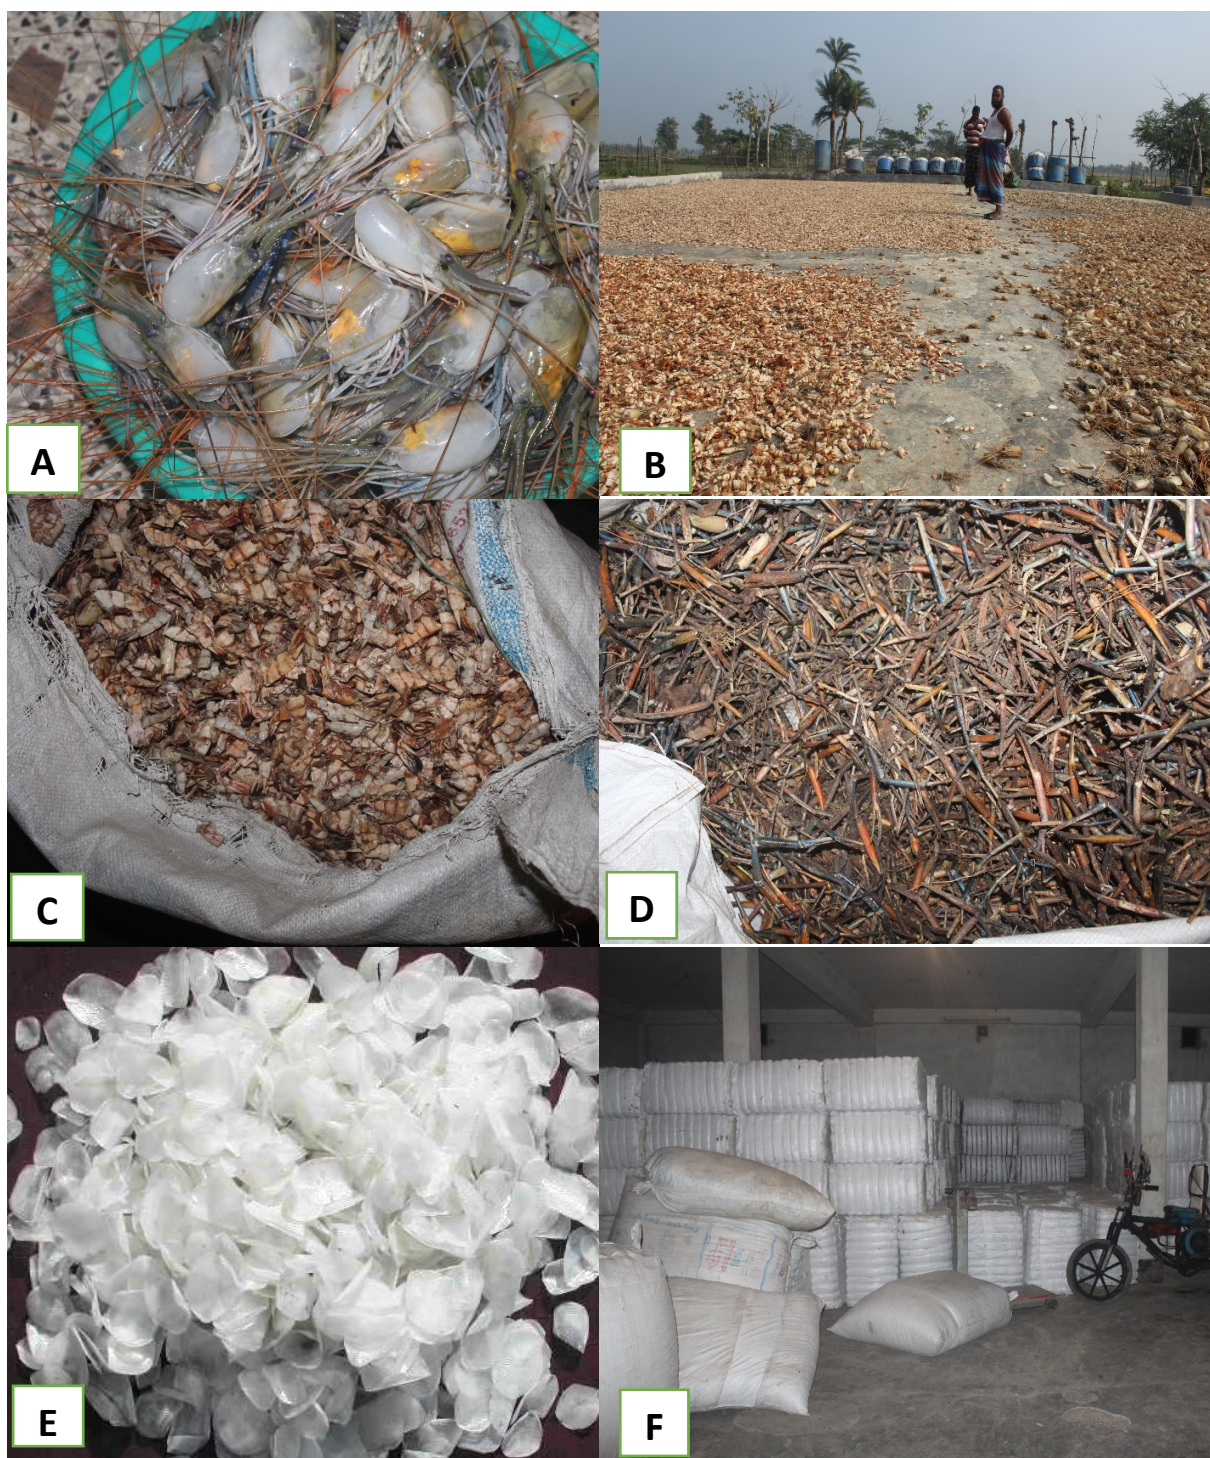

Figure 3. Usages of shrimp head, shell, appendages and fish scale at Khulna: (A) Fresh shrimp head (B) Shrimp head and shell is drying at drying yard of Rupsha, Khulna (C) Dried shrimp shell (D) Dried shrimp appendages (E) Dried Fish Scale and (F) Shrimp head and shrimp shell sacks ready for shipment.

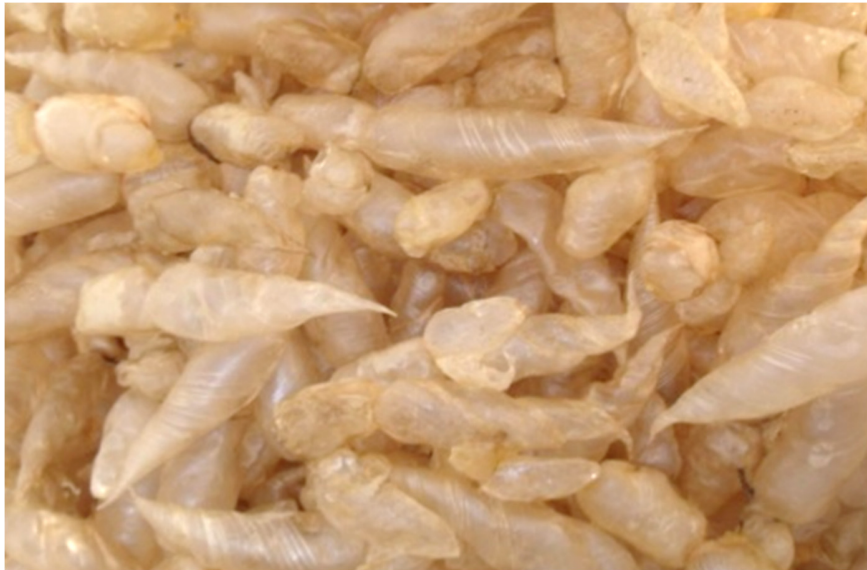

Figure 4. Air bladder collected to process and export. Photo collected from Belton et al. (2014).

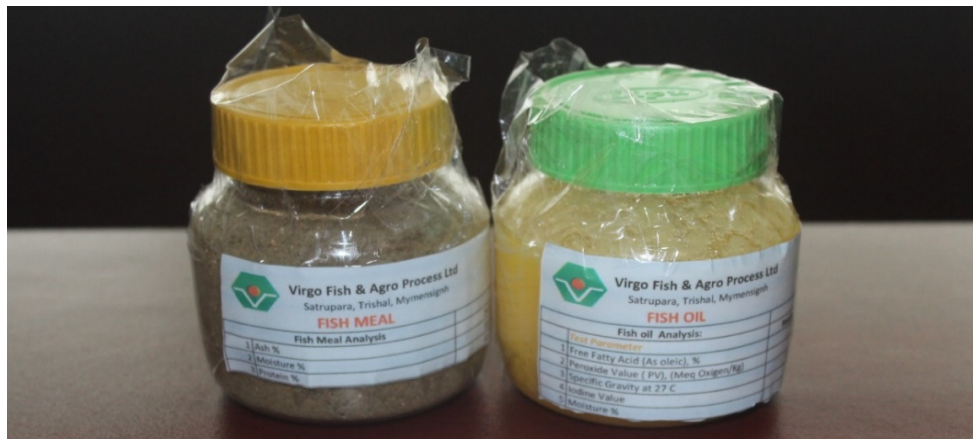

Figure 5. Fish meal and fish oil produced from pangas fillet by-products and marine trash fish

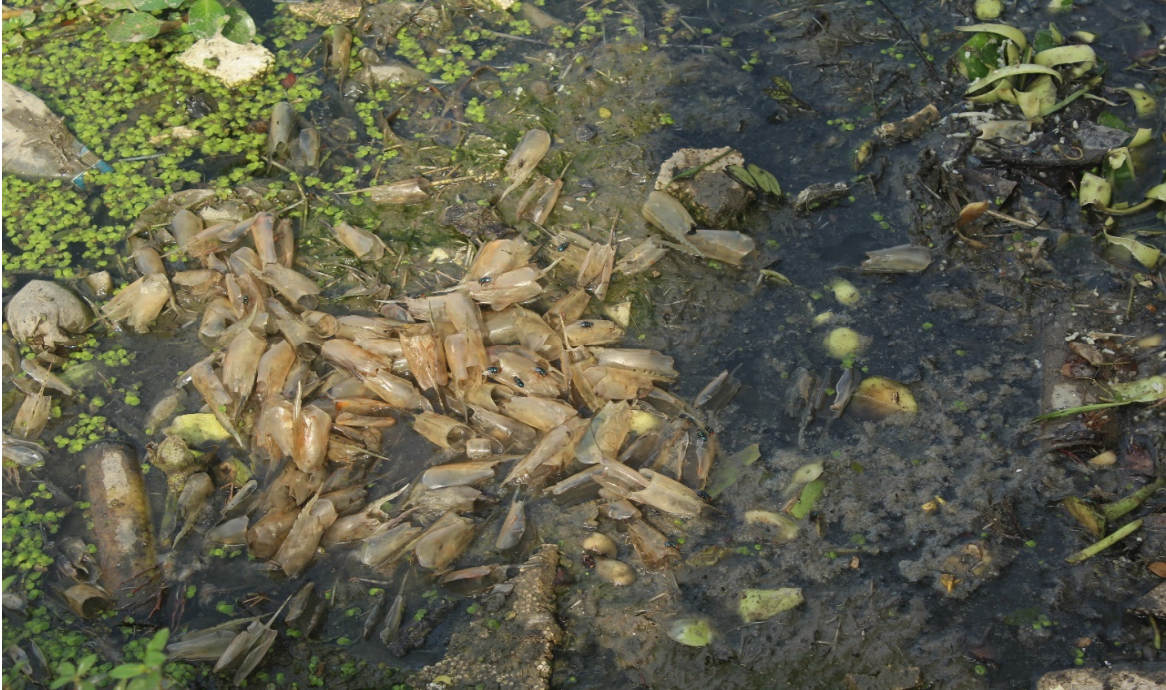

Figure 6. Direct application of shrimp and fish waste pollutes the water quality and create visual pollution.
